# Supplementary material
Source: PubMed Central journal article supplement (PMC2424114)

Cancer Cell, Volume 12

**Supplemental Data**

**FGFR3 Activates RSK2 to Mediate Hematopoietic Transformation through Both Tyrosine Phosphorylation of RSK2 and Activation of the MEK/ERK Pathway**

Sumin Kang, Shaozhong Dong, Ting-Lei Gu, Ailan Guo, Michael S. Cohen, Sagar Lonial, Hanna

Jean Khoury, Dorian Fabbro, D. Gary Gilliland, P. Leif Bergsagel, Jack Taunton, Roberto D.

Polakiewicz, and Jing Chen

## Figure S1

U0126 treatment inhibits FGFR3-dependent activation of RSK2. Ba/F3 cells stably expressing FGFR3 TDII and myc-tagged RSK2 WT or  $\Delta$ C20 mutant were cultured in the presence of aFGF with withdrawal of IL-3 and serum for 4 hours. Cells were treated with U0126 (10 $\mu$ M) for 90 min prior to harvest of cell lysates. *Upper:* Immunocomplexes of myc-tagged RSK2 variants were isolated and incubated with equal amount of S6-peptide and [ $\gamma$ -<sup>32</sup>P] ATP. The phosphorylation of S6 peptide was normalized to readings from reactions using myc-immunocomplexes from cells stably expressing FGFR3 TDII alone in the absence of U0126 (0.0), and cells co-expressing TDII and myc-RSK2 WT in the absence of U0126 (1.0). The data were presented as mean $\pm$ SD (n=3). *Lower:* Parallel immunoprecipitation and Western blotting results confirmed equal amounts of myc-RSK2 proteins in each kinase reaction.

## Supplemental Figure 1

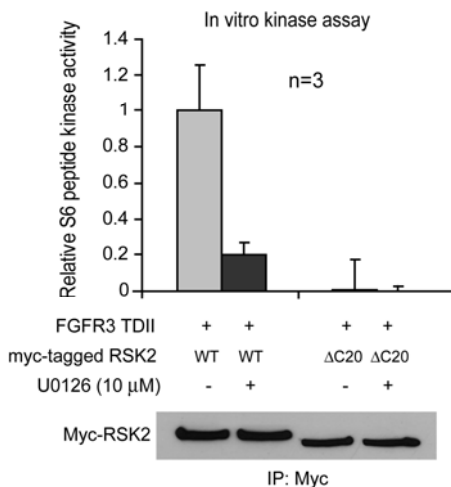

Supplement: NIHMS44667-supplement-supplemental_d.pdf [file NIHMS44667-supplement-supplemental_d.pdf]
